# Supplementary material for: Conceptual and Analytical Framework as Flood Risk Mapping Subsidy
Source: MDPI journal article supplement (doi:10.3390/geohazards3030020), 2022-07-27
Supplement: s1 [file s1]

## Supplementary Material

### 1. Information about standard design

Some of the main elements used by the NBR 12721/2005 to define building patterns, and consequently the cost of the square meter of single-family homes, is the area and the list of rooms as described in Table S1.

Table S1: Main features of standard single-family home designs.

| Class | Pattern | List of rooms                                                                                                                                                  | Real area (m <sup>2</sup> ) | Dwellers socioeconomic class (ABEP, 2019; Nagem, 2008) |
|-------|---------|----------------------------------------------------------------------------------------------------------------------------------------------------------------|-----------------------------|--------------------------------------------------------|
| R1-B  | Low     | 2 bedrms<br>1 bathroom<br>1 living room<br>1 kitchen<br>1 laundry area                                                                                         | 58.64                       | C/D                                                    |
| R1-N  | Normal  | 3 bedrooms<br>3 bathrooms<br>1 living room<br>1 corridor<br>1 kitchen<br>1 laundry area<br>1 balcony<br>1 garage                                               | 106.44                      | B1/B2                                                  |
| R1-A  | High    | 4 bedrooms<br>4 bathrooms<br>1 closet<br>1 living room<br>1 dining room<br>1 family room<br>1 corridor<br>1 kitchen<br>1 laundry area<br>1 balcony<br>1 garage | 224.82                      | A                                                      |
| RP1Q  | Popular | 1 bedroom<br>1 bathroom<br>1 living room<br>1 kitchen                                                                                                          | 39.56                       | E                                                      |

Source: Adapted from ABNT (2006).

We arbitrated the standard property as class R1-N regarding the inventory. We used a multiplier factor present in Equation 4 for the other classes. This factor is obtained based on scores referring to economic classifications defined by the ABEP (2019), as shown in Table S2.

Table S2: Multiplier factor of standard property contents (Fm)

| Socioeconomic class | Multiplier factor<br>(R1-N standard property) | Correspondent dwelling class |
|---------------------|-----------------------------------------------|------------------------------|
| A                   | 2.70                                          | R1-A                         |
| B1                  | 1.19                                          | R1-N                         |
| B2                  | 1.00                                          | R1-N                         |
| C1                  | 0.76                                          | R1-B                         |
| C2                  | 0.59                                          | R1-B                         |
| D                   | 0.43                                          | R1-B                         |
| E                   | 0.43                                          | RP1Q                         |

Source: Adapted from ABEP (2019).
